# Supplementary figures and images for: Novel cytokine–antibody fusion protein, N-820, to enhance the functions of ex vivo expanded natural killer cells against Burkitt lymphoma
Source: PubMed Central journal article supplement — J Immunother Cancer. 2020 Oct 27;8(2):e001238. doi: 10.1136/jitc-2020-001238 (PMC7592258; doi:10.1136/jitc-2020-001238), 2020-10-27

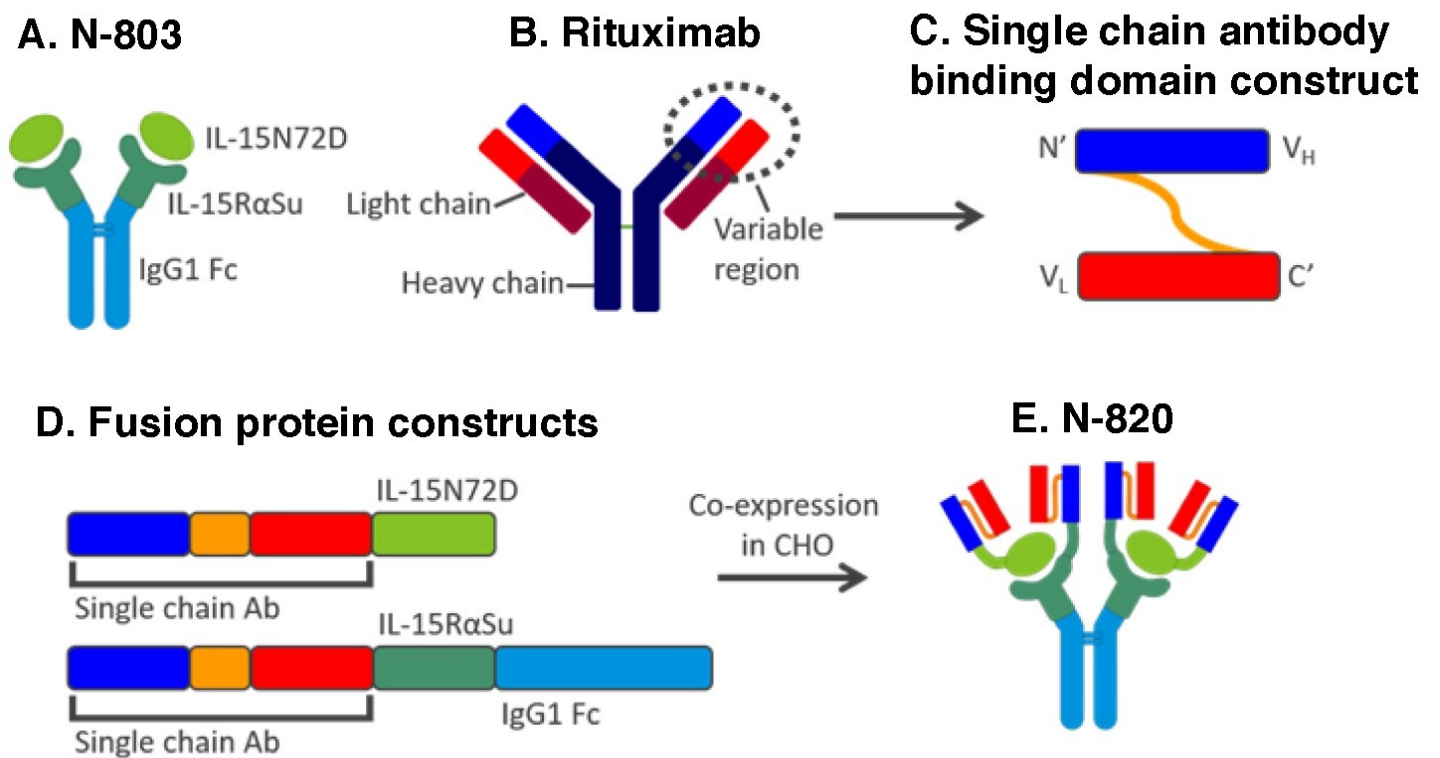

Supplement: jitc-2020-001238supp002.pdf [file jitc-2020-001238supp002.pdf]

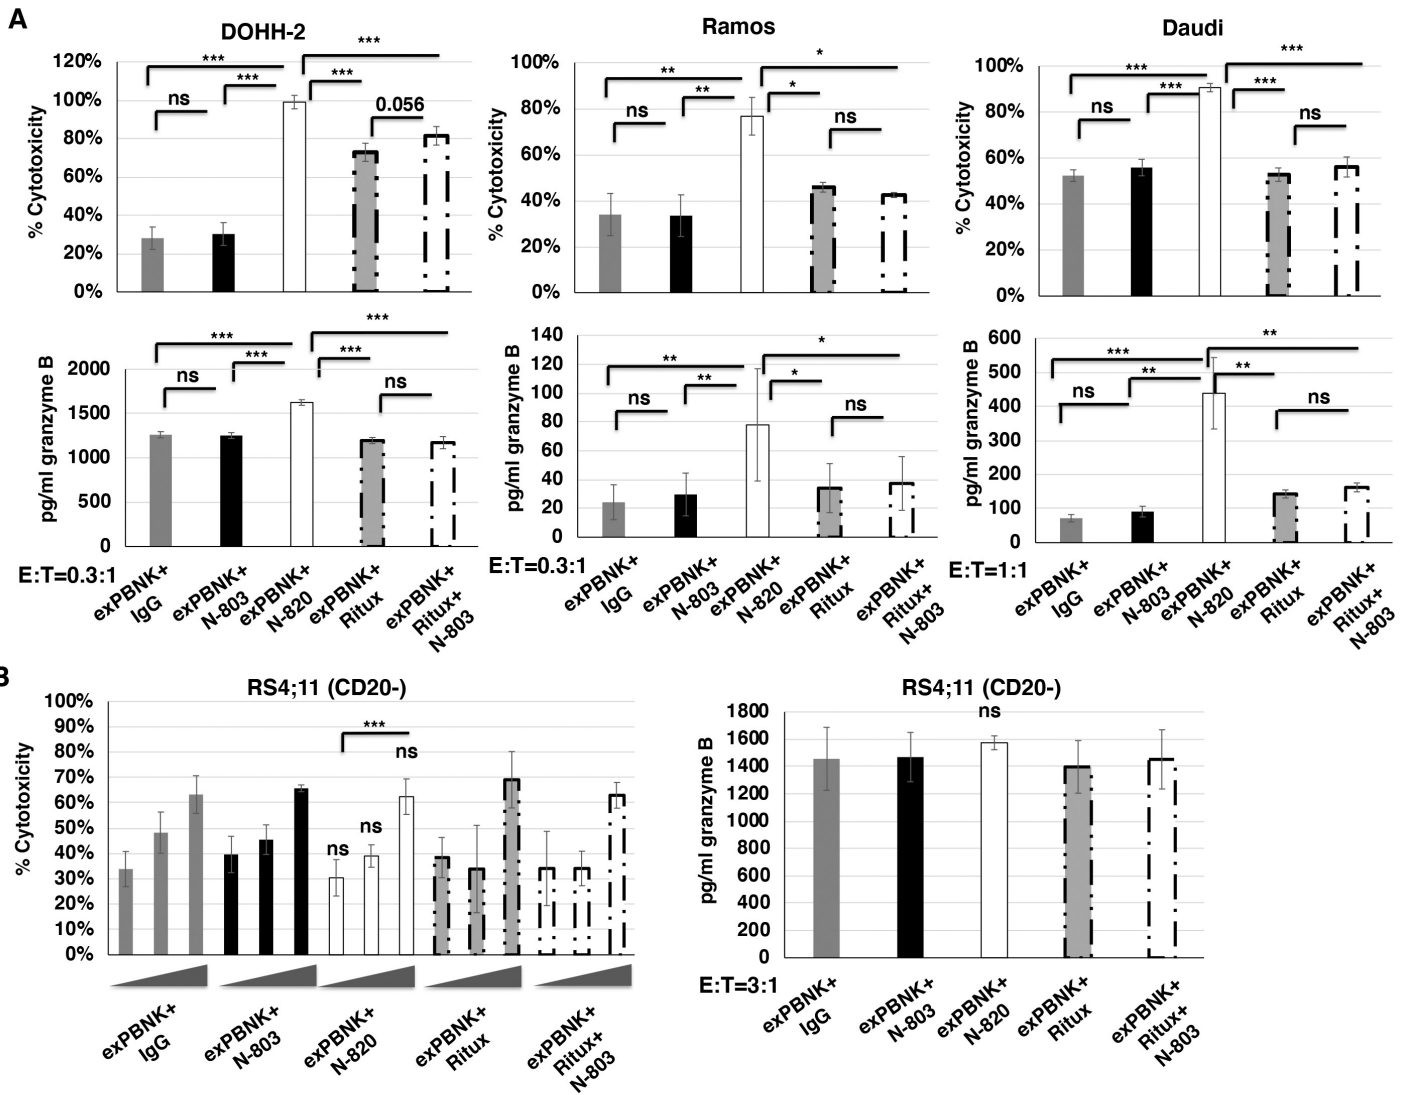

Supplement: jitc-2020-001238supp003.pdf [file jitc-2020-001238supp003.pdf]
